# Supplementary material
Source: MDPI journal article supplement (https://www.mdpi.com/2504-5377/6/3/42)
Supplement: s1 [file s1]

# Single-Stranded DNA Recognition over Fluorescent Gold-Aryl Nanoparticles

Javad B. M. Parambath <sup>1,2</sup>, Gayathri A. Kanu <sup>3</sup>, Raed O. Abu Odeh <sup>3</sup>, Sanghyeon Kim <sup>4</sup>, Changseok Han <sup>4,5</sup>  
and Ahmed A. Mohamed <sup>1,2,\*</sup>

- <sup>1</sup> Department of Chemistry, College of Sciences, University of Sharjah, Sharjah 27272, United Arab Emirates
- <sup>2</sup> Center for Advanced Materials Research, Research Institute of Sciences and Engineering, University of Sharjah, Sharjah 27272, United Arab Emirates
- <sup>3</sup> Department of Medical Laboratory Sciences, College of Health Sciences, University of Sharjah, Sharjah 27272, United Arab Emirates
- <sup>4</sup> Program in Environmental & Polymer Engineering, Graduate School, INHA University, Incheon 22212, Korea
- <sup>5</sup> Department of Environmental Engineering, INHA University, 100 Inha-ro, Michuhol-gu, Incheon 22212, Korea

|                    |                     |
|--------------------|---------------------|
| Javad Parambath    | 0000-0002-5069-2143 |
| Gayathri Arumughan | 0000-0001-7825-245X |
| Raed Abu Odeh      | 0000-0001-9123-6956 |
| Sanghyeon Kim      | 0000-0003-0662-9152 |
| Changseok Han      | 0000-0002-8636-2859 |
| Ahmed Mohamed      | 0000-0001-7369-3117 |

Corresponding Author:  
Ahmed A. Mohamed  
Email: amohamed61@gmail.com

## **Table of Contents:**

- S1.** Visible light and UV irradiated photographs
- S2.** ATR-FTIR spectra
- S3.** Fluorescent emission spectra
- S4.** Time resolved photoluminescence measurements
  - S4.1 Table: Time-resolved fluorescent lifetime measurements
- S5.** P-XRD spectra
- S6.** Time resolved photoluminescence measurements for ssDNA recognition
- S6.1 Table:** Time-resolved fluorescent lifetime measurements

## S1. Visible and UV irradiated photographs

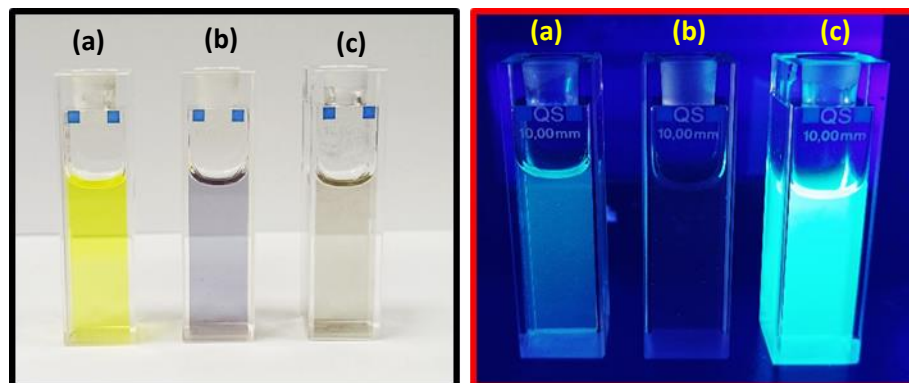

**Figure S1.** Visible and UV irradiated photographs showing (a) dansyl chloride, (b) AuNPs-COOH and (c) AuNPs-DNS.

## S 2. ATR-FTIR spectra

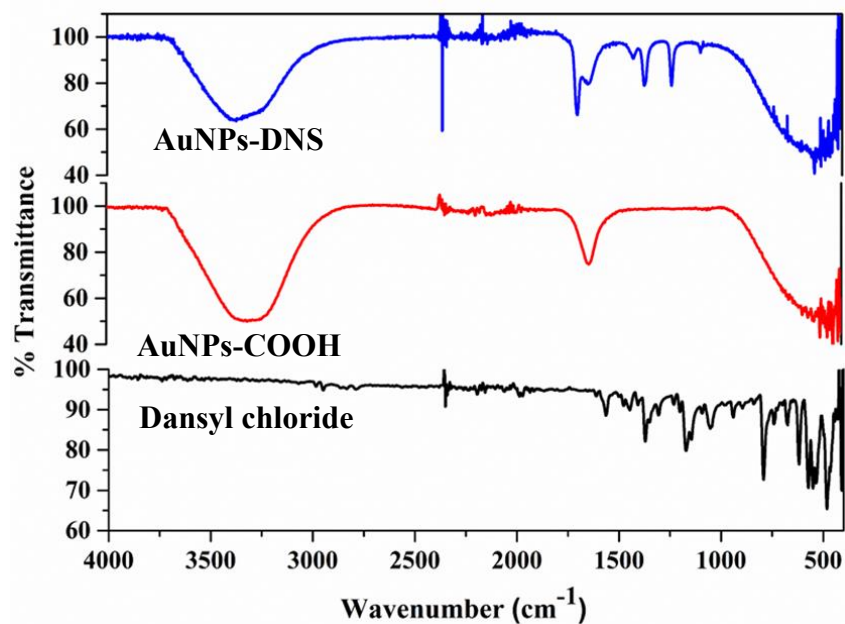

**Figure S2.** ATR-FTIR spectra of dansyl chloride, AuNPs-COOH, and AuNPs-dansyl

### S3. Emission spectra

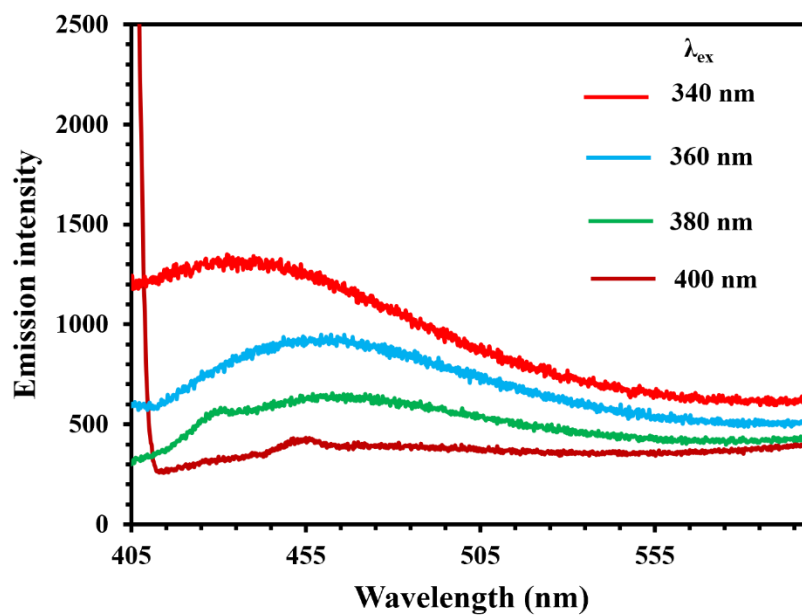

**Figure S3.** Fluorescence emission spectra of dansyl chloride at different excitation wavelengths.

#### S4. Time resolved photoluminescence measurements

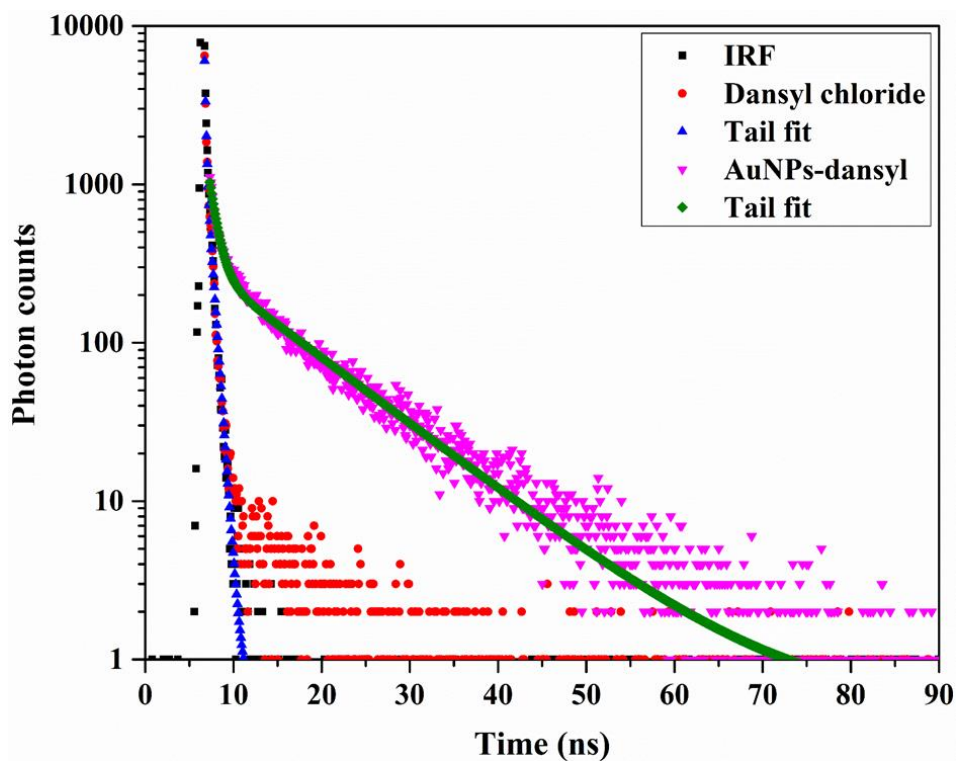

**Figure S4.** Solution state fluorescence lifetime decays for dansyl chloride and AuNPs-dansyl.

**Table S4.1.** Time-resolved fluorescent lifetime measurements showing decay time and  $\chi^2$  values for dansyl chloride and AuNPs-dansyl.

| Solutions       | $\tau_1$ (ns) | $\tau_2$ (ns) | $\chi^2$ |
|-----------------|---------------|---------------|----------|
| Dansyl chloride | 0.12          | 0.54          | 1.09     |
| AuNPs-dansyl    | 0.89          | 10.37         | 1.10     |

## S5. P-XRD spectra

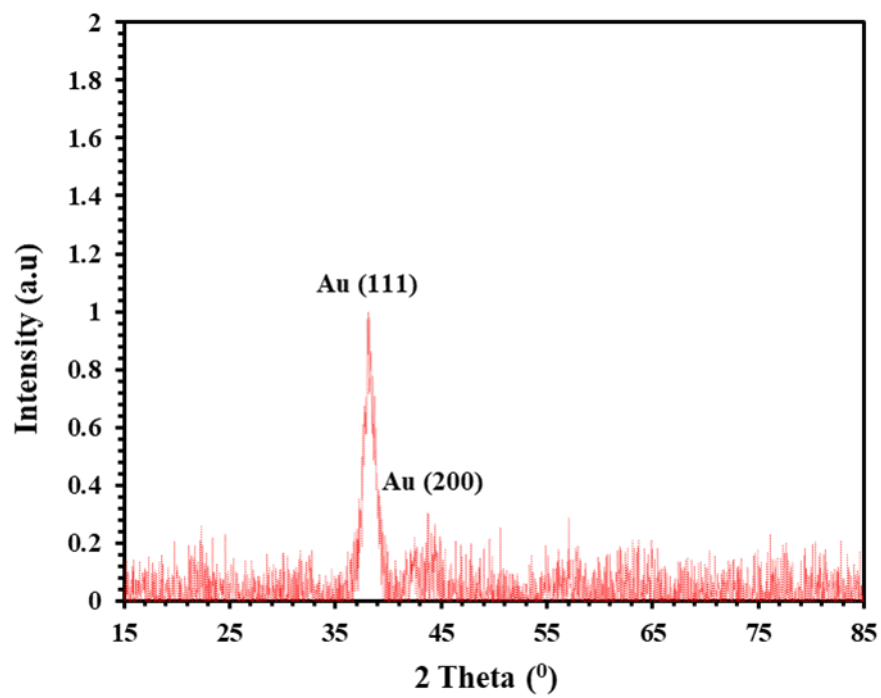

**Figure S5.** P-XRD pattern for AuNPs-DNS showing gold diffraction peaks.

## S6. Time resolved photoluminescence measurements for ssDNA recognition

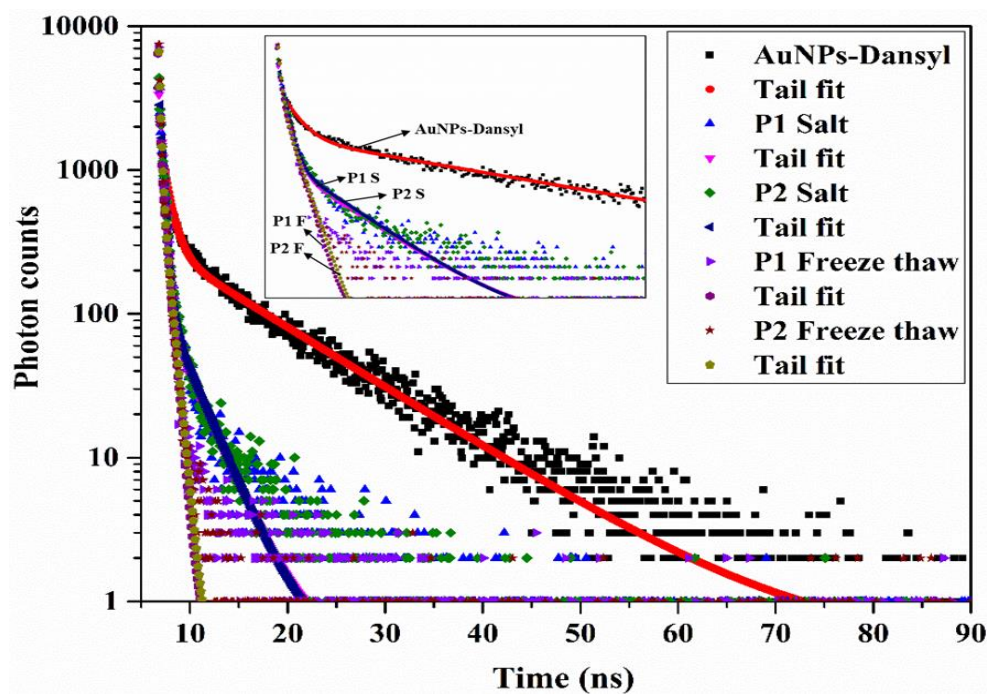

**Figure S6.** Fluorescence lifetime decays of AuNPs-dansyl solution immobilized with ssDNA (P1 and P2) using freeze-thaw and salt-aging methods.

**Table S6.1.** Time-resolved fluorescent lifetime measurements showing decay time and  $\chi^2$  values for ssDNA immobilized on AuNPs-dansyl.

| Solutions      | $\tau_1$ (ns) | $\tau_2$ (ns) | $\chi^2$ |
|----------------|---------------|---------------|----------|
| AuNPs-dansyl   | 0.89          | 10.37         | 1.10     |
| P1 Freeze-thaw | 0.14          | 0.54          | 1.00     |
| P2 Freeze-thaw | 0.15          | 0.61          | 1.01     |
| P1 Salt-aging  | 0.37          | 2.78          | 1.00     |
| P2 Salt-aging  | 0.35          | 2.69          | 1.01     |
